# Supplementary material for: Enhanced photocatalytic activity of the direct Z-scheme black phosphorus/BiOX (X = Cl, Br, I) heterostructures
Source: Royal Society of Chemistry journal article supplement (doi:10.1039/d1cp02124a), 2021-01-01
Supplement: d1cp02124a1.pdf [file d1cp02124a1.pdf]

---

## Supporting Information:

### Enhanced photocatalytic activity of the direct Z-scheme black phosphorus/BiOX (X=Cl, Br, I) heterostructures

Sheng Tian<sup>a</sup>, Yu-Feng Ding<sup>a</sup>, Meng-Qiu Cai<sup>\*,b</sup>, Lang Chen<sup>\*,a</sup>, Chak-Tong Au<sup>c</sup>,

Shuang-Feng Yin<sup>\*,a</sup>

<sup>a</sup> Advanced Catalytic Engineering Research Center of the Ministry of Education, State Key Laboratory of Chemo/Biosensing and Chemometrics, College of Chemistry and Chemical Engineering, Provincial Hunan Key Laboratory for Cost-effective Utilization of Fossil Fuel Aimed at Reducing Carbon-dioxide Emissions, Hunan University, Changsha 410082, Hunan Province, P. R. China.

<sup>b</sup> School of Physics and Electronics Science, Hunan University, Changsha 410082, P. R. China.

<sup>c</sup> College of Chemical Engineering, Fuzhou University, Fuzhou 350002, Fujian Province, P. R. China.

**Table S1** The calculated lattice parameters of BP and BiOX monolayers

|       | BP    | BiOCl | BiOBr | BiOI  |
|-------|-------|-------|-------|-------|
| a (Å) | 3.298 | 3.914 | 3.949 | 4.020 |
| b (Å) | 4.582 | 3.914 | 3.949 | 4.020 |

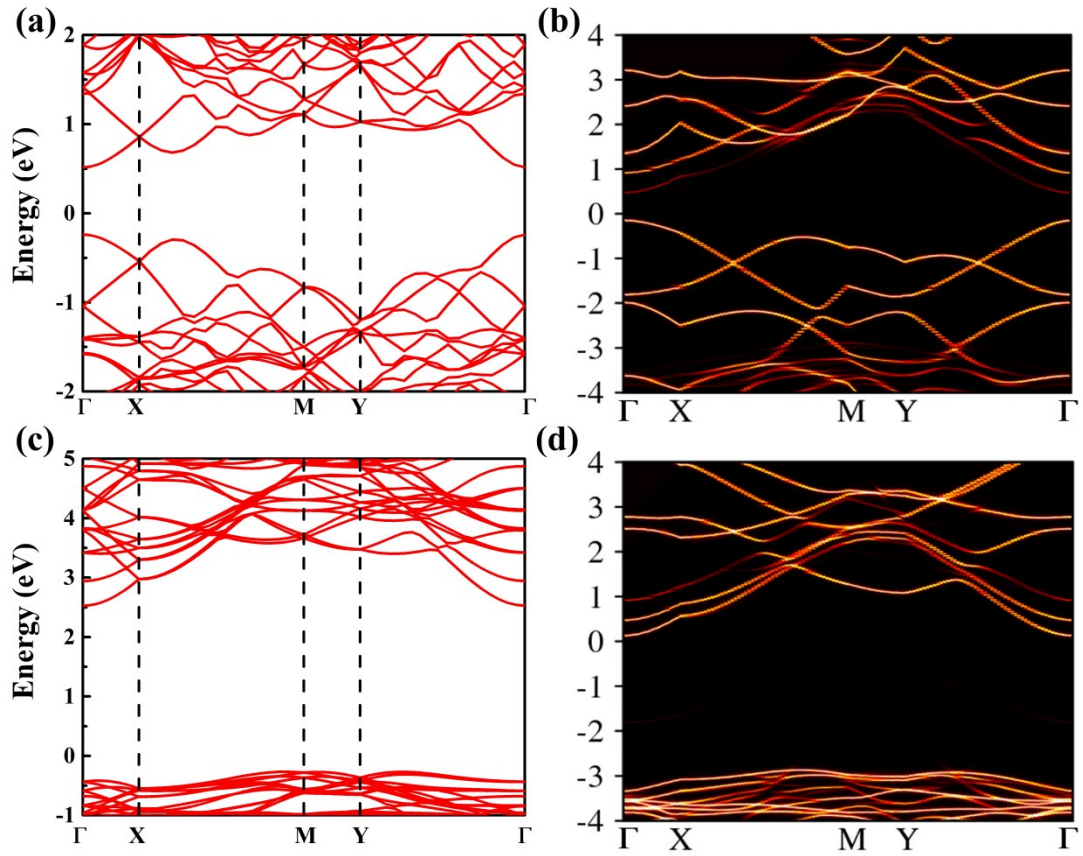

**Fig. S1** The band structures (with PBE) for isolated BP (a) and (c) BiOCl monolayers in the BP/BiOCl heterostructure lattice. The unfolded bands derived from the k-projection method are shown in (b) and (d).

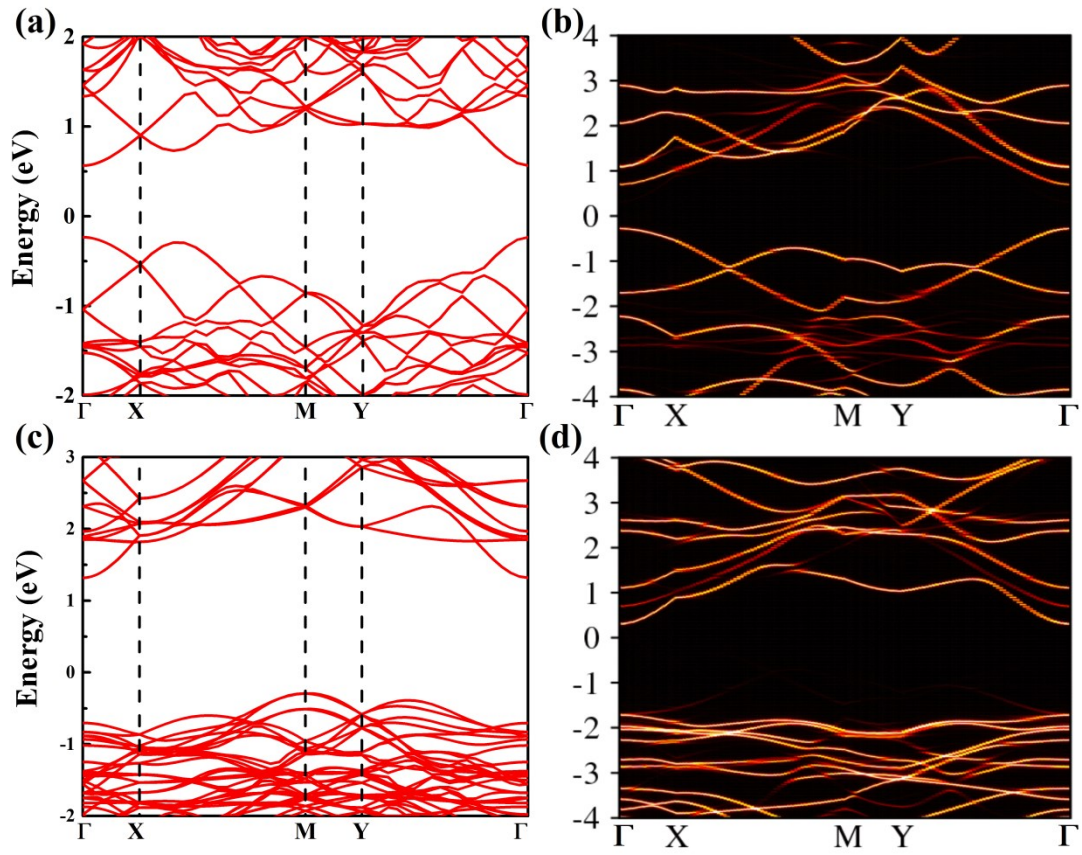

**Fig. S2** The band structures (with PBE) for isolated (a) BP and (c) BiOI monolayers in the BP/BiOI heterostructure lattice. The unfolded bands derived from the k-projection method are shown in (b) and (d).

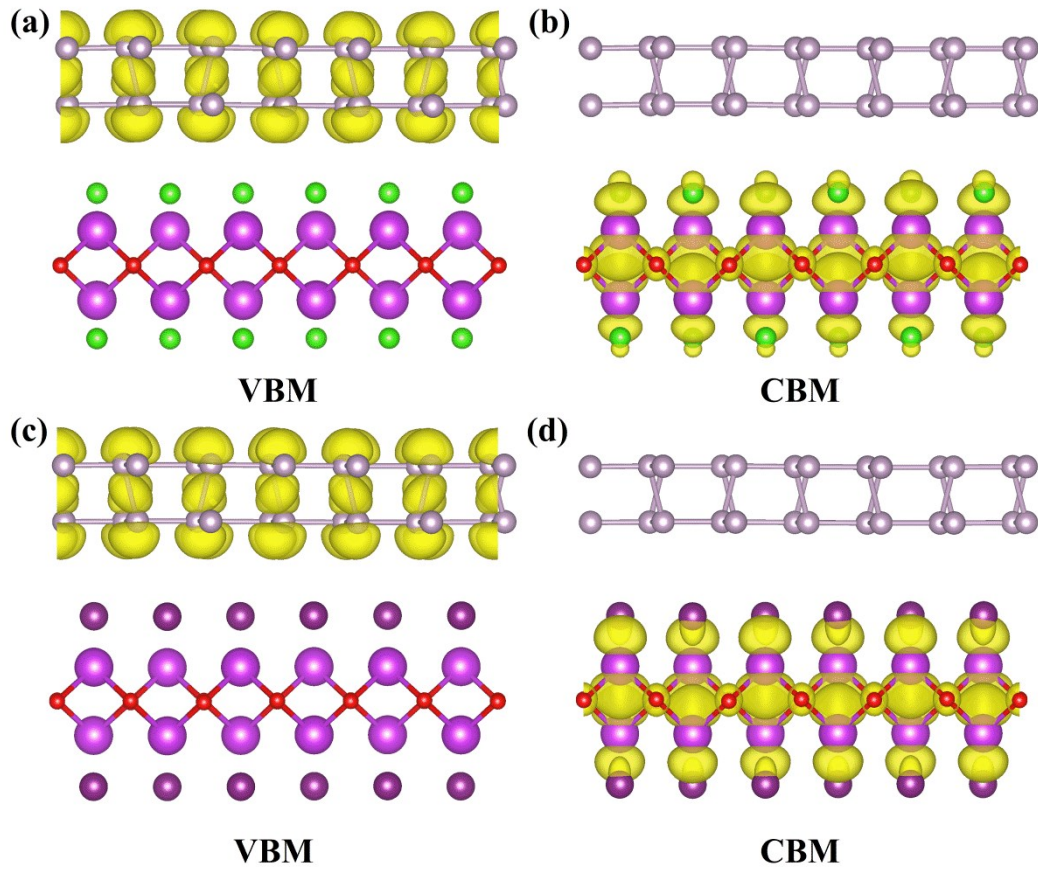

**Fig. S3** (a) and (b) show the charge distribution of the VBM and CBM of BP/BiOCl heterostructure, respectively. (c) and (d) show the charge distribution of the VBM and CBM of BP/BiOI heterostructure, respectively. Yellow areas denote electron accumulation.

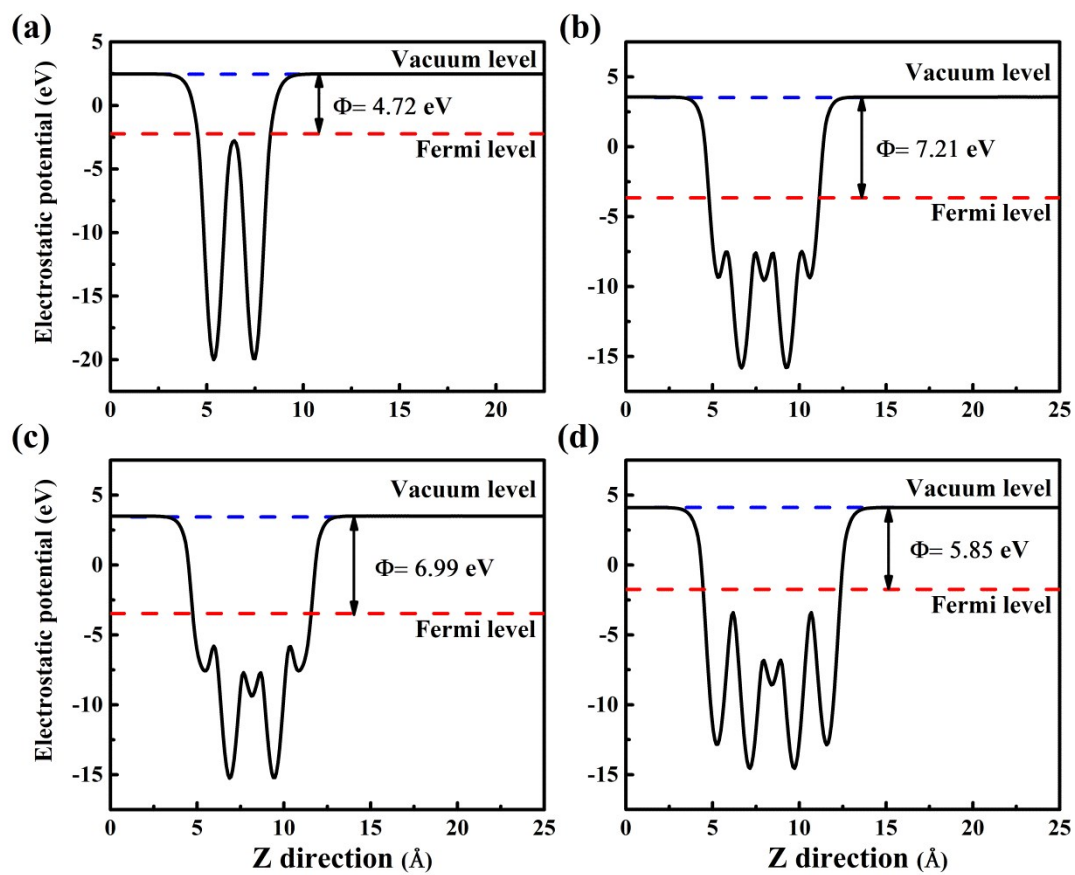

**Fig. S4** The electrostatic potentials along Z direction of the isolated (a) BP, (b) BiOCl, (c) BiOBr and (d) BiOI.

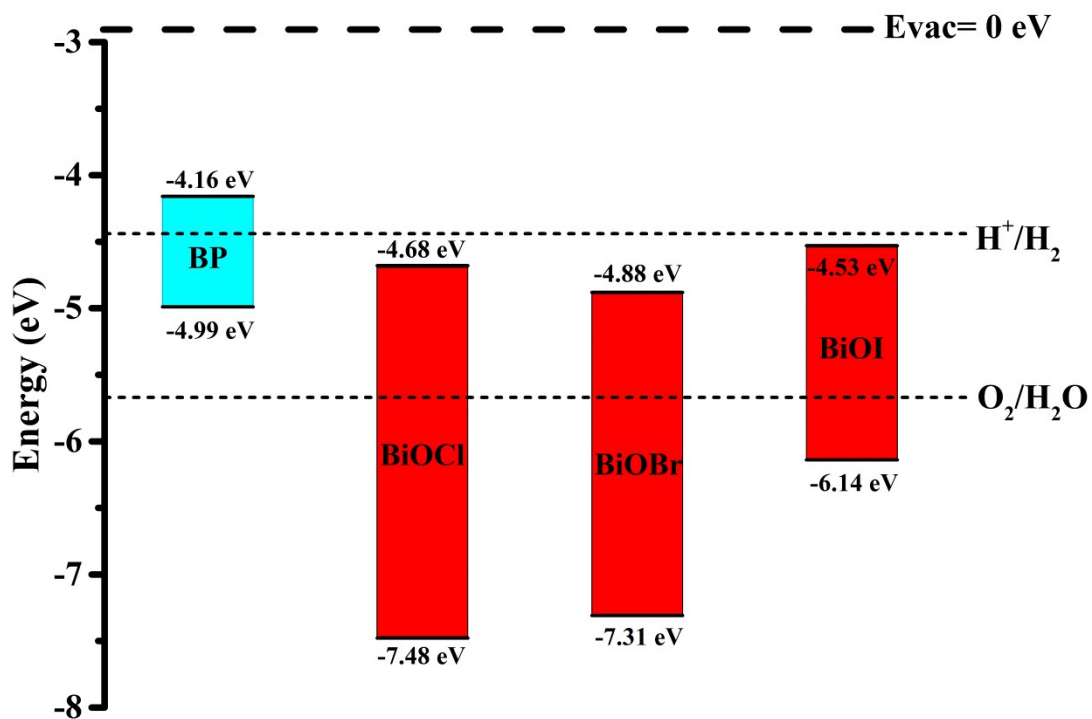

Fig. S5 Diagrams of the band edge positions of isolated BP, BiOCl, BiOBr and BiOI.
